# Supplementary material for: Wild, insectivorous bats might be carriers of Campylobacter spp
Source: PLoS One. 2018 Jan 11;13(1):e0190647. doi: 10.1371/journal.pone.0190647 (PMC5764278; doi:10.1371/journal.pone.0190647)
Supplement: S1 Table — (XLSX) [file pone.0190647.s001.xlsx]

## Sheet: database Bruker
S1 Table. Relevant strains present in MALDI TOF MS database used for typing of the Campylobacter strains.
Meaning of Score Values					Relevant contents MALDI-TOF MS database Bruker (version 6.0)
Range	Description	Symbols	Color		Campylobacter	Helicobacter	Arcobacter
2.300-3.000	Highly probable species identification	(+++)	green		C. avium	H. canadensis	A. butzleri
2.000-2.299	secure genus identification, probable species identification	(++)	green		C. canadensis	H. canis	A. cibarius
1.700-1.999	probable genus identification	(+)	yellow		C. coli	H. cholecystus	A. cryaerophilus
0.000-1.699	not reliable identification	(-)	red		C. concisus	H. cinaedi	A. halophilus
					C. curvus	H. fennelliae	A. nitrofigilis
					C. fetus	H. mustelae	A. skirrowi
					C. gracilis	H. pullorum
					C. helveticus	H. pylori
					C. hominis
					C. hyointestinalis
					C. jejuni
					C. lanienae
					C. lari
					C. peloridis
					C. rectus
					C. showae
					C. sputorum
					C. upsaliensis
					C. ureolyticus
