# Supplementary material for: Wild, insectivorous bats might be carriers of Campylobacter spp
Source: PLoS One. 2018 Jan 11;13(1):e0190647. doi: 10.1371/journal.pone.0190647 (PMC5764278; doi:10.1371/journal.pone.0190647)
Supplement: S3 Table — The following techniques were used: duplex real-time PCR for determination of C. jejuni and C. coli; Multilocus Sequence typing (resulting in Sequence Types (ST)); MALDI TOF MS (Maldi); Whole Genome sequencing (WGS); in silico Sequence Typing (in silico ST). For strains 8, 16 and 17, multiple isolates were typed. (XLSX) [file pone.0190647.s003.xlsx]

## Sheet: Suppl Table
S3 Table. Combined confirmation- and typing data of 17 Campylobacter strains isolated from bats. The following techniques were used: duplex real-time PCR for determination of C. jejuni and C. coli; Multilocus Sequence typing (resulting in Sequence Types (ST)); MALDI TOF MS (Maldi); Whole Genome sequencing (WGS); in silico Sequence Typing (in silico ST). For strains 8, 16 and 17, multiple isolates…
Isolation route1	Strain (Table 2)	Result real-time PCR jejuni/coli	ST	Clonal complex	Strain id in pubmlst.org	Maldi trial 1	Maldi result trial 1	Maldi trial 2	Maldi result trial 2	In silico Campylobacter species confirmation (WGS)2	BLAST identity	In silico ST	Clonal complex	New ST
mCCDA	1	jejuni	991	ST-692	62204	2.255	jejuni	1.978	jejuni	jejuni	0.97	991	ST-692
mCCDA	2	jejuni	432	ST-61	62205			1.914	jejuni	jejuni	1	432	ST-61
PB 24 h	3	jejuni	583	ST-45	62208	2.305	jejuni	2.155	jejuni	jejuni	1	583	ST-45
mCCDA	4	jejuni	704		62209	2.095	jejuni	2.116	jejuni	jejuni	1	704
PB 24 h	5	jejuni	334	ST-45	62212			2.15	jejuni	jejuni	1	334	ST-45
mCCDA	6	negative			64042	1.803	coli	1.642	no ID	coli	1	2007
PB 24 h	7	negative			64043			1.852	coli	coli	1	2007
BB 24 h	8	negative			62203					coli	1	9007		x
PB 24 h	8	negative				1.627	no ID	1.761	coli
PB 48 h	9	negative	8519		32765	1.805	coli	1.75	coli	coli	1	8519		x
PB 48 h	10	jejuni	19	ST-21	64041	2.385	jejuni	2.329	jejuni	jejuni	1	19	ST-21
PB 24 h	11	coli	7255		28891	2.08	coli	2.113	coli	coli	0.93	7255		x
PB 24 h	12	negative			513	1.493	no ID	1.522	no ID	lari	0.87	138		x
PB 24 h	13	negative			62201			1.869	coli	coli	1	9005		x
PB 24 h	14	jejuni	267	ST-283	62214	<0	no ID	2.252	jejuni	jejuni	1	267	ST-283
PB 24 h	15	negative			62202	1.87		1.789	coli	coli	1	9006		x
PB 24 h	16	jejuni								jejuni	1	48	ST-48
PB 48 h	16	jejuni	48	ST-48	62215			2.212	jejuni
mCCDA	17	jejuni								jejuni	1	2274
PB 24 h	17	jejuni	2274		62216			2.171	jejuni
1 Explanation of abbreviations:
mCCDA:	direct streak on mCCDA
PB:	Enrichment via Preston Broth
BB:	Enrichment via Bolton Broth
2 Probe sequences for the in silico BLAST:						length:
C. coli:	5'-TGCTACAACAAGTCCAGCAATGTGTGCA-3'					28
C. jejuni:	5'-AATCAAAGCCGCATAAACACCTTGATTAGC-3'					30
C. lari:	5'-CATCCTAGTCCATTCCCTTATGCTCATGTT-3'					30
C. upsaliensis:	5'-CCTTTCCCTCACGCACACATCG-3'					22
